# Supplementary material for: Hysterectomy for Benign Indications and Risk of Cataract Formation in South Korean Women
Source: MDPI journal article supplement (doi:10.3390/medicina59091627), 2023-09-08
Supplement: s1 [file s1]

**Supplementary Table S1.** Case/person-years for cataracts in participants with or without hysterectomy  
(National Health Insurance Database, 2007–2020)

|                                  | Non-Hysterectomy    | Hysterectomy        | Hysterectomy +<br>adnexal surgery |
|----------------------------------|---------------------|---------------------|-----------------------------------|
| Total                            | 1,787/663,863 (269) | 1,235/523,966 (236) | 413/150,612 (274)                 |
| Age at inclusion (years)         |                     |                     |                                   |
| 40~44                            | 243/252,239 (96)    | 175/166,750 (105)   | 36/38,788 (93)                    |
| 45~49                            | 505/227,081 (222)   | 478/227,159 (210)   | 136/58,174 (234)                  |
| 50~54                            | 717/151,008 (475)   | 442/112,155 (394)   | 164/42,351 (387)                  |
| 50~55                            | 322/33,534 (960)    | 140/17,902 (782)    | 77/11,299 (682)                   |
| SES                              |                     |                     |                                   |
| Mid to high SES                  | 1,710/645,210 (265) | 1,195/509,228 (235) | 397/146,638 (271)                 |
| Low SES                          | 77/18,652 (413)     | 40/14,738 (271)     | 16/3,974 (403)                    |
| Region                           |                     |                     |                                   |
| Urban area                       | 1,105/378,433 (292) | 794/310,224 (256)   | 284/96,993 (293)                  |
| Rural area                       | 682/285,430 (239)   | 441/213,742 (206)   | 129/53,619 (241)                  |
| CCI                              |                     |                     |                                   |
| 0                                | 1,113/492,242 (226) | 809/387,409 (209)   | 250/108,950 (229)                 |
| 1                                | 361/99,976 (361)    | 252/78,130 (323)    | 92/23,798 (387)                   |
| ≥2                               | 313/71,644 (437)    | 174/58,427 (298)    | 71/17,863 (397)                   |
| Parity in cohort                 |                     |                     |                                   |
| 0                                | 1,777/655,517 (271) | 1,230/516,946 (238) | 412/149,087 (276)                 |
| 1                                | 8/6,035 (133)       | 3/4,940 (61)        | /1,119 (0)                        |
| ≥2                               | 2/2,311 (87)        | 2/2,080 (96)        | 1/406 (246)                       |
| Adnexal surgery before inclusion |                     |                     |                                   |
| Absent                           | 1,776/654,917 (271) | 1,227/518,800 (237) | 409/147,361 (278)                 |
| Present                          | 11/8,945 (123)      | 8/5,166 (155)       | 4/3,251 (123)                     |
| Hypertension before inclusion    |                     |                     |                                   |
| Absent                           | 1,292/557,367 (232) | 946/437,784 (216)   | 270/120,586 (224)                 |
| Present                          | 495/106,496 (465)   | 289/86,182 (335)    | 143/30,025 (476)                  |
| DM before inclusion              |                     |                     |                                   |
| Absent                           | 1,442/607,675 (237) | 1,005/478,121 (210) | 317/135,209 (234)                 |
| Present                          | 345/56,188 (614)    | 230/45,845 (502)    | 96/15,403 (623)                   |
| Dyslipidemia before inclusion    |                     |                     |                                   |
| Absent                           | 1,210/531,806 (228) | 887/418,870 (212)   | 249/115,901 (215)                 |
| Present                          | 577/132,056 (437)   | 348/105,096 (331)   | 164/34,711 (472)                  |
| Menopause before inclusion       |                     |                     |                                   |
| Absent                           | 1,385/590,053 (235) | 1,001/470,903 (213) | 317/130,000 (244)                 |
| Present                          | 402/73,810 (545)    | 234/53,036 (441)    | 96/20,611 (466)                   |
| MHT before inclusion             |                     |                     |                                   |
| Absent                           | 1,729/654,675 (264) | 1,194/515,108 (232) | 402/147,283 (273)                 |
| Present                          | 58/9,188 (631)      | 41/8,858 (463)      | 11/3,329 (330)                    |
| MHT after inclusion              |                     |                     |                                   |
| Absent                           | 1,647/614,637 (268) | 1,014/446,645 (227) | 326/117,650 (277)                 |
| Present                          | 140/49,226 (284)    | 221/77,321 (286)    | 87/32,962 (264)                   |

CCI, Charlson comorbidity index; DM, diabetes mellitus; MHT, menopausal hormone therapy; SES, socioeconomic status. Data are expressed as the case/person-years (case/100,000 person-years).
